# Supplementary material for: Cooperative enzymatic control of N-acyl amino acids by PM20D1 and FAAH
Source: eLife. 2020 Apr 9;9:e55211. doi: 10.7554/eLife.55211 (PMC7145423; doi:10.7554/eLife.55211)
Supplement: Figure 4—source data 1. [file elife-55211-fig4-data1.xlsx]

## Sheet: Table S1
Fig. 4. - Source Data 1. Absolute quantitation of N-acyl amino acids in liver and plasma following FAAH blockade, corresponding to Fig. 4.
Tissue and units	N-acyl amino acid	Control	FAAH-KO	PF-3845 (3 h)	PF-3845 (3 d)
Liver (pmol/g)	C18:1-Gly	530.9 ± 95.7	420.3 ± 120.4	259.2 ± 35.4	423.6 ± 167.1
Liver (pmol/g)	C18:1-Ala	757.7 ± 80.2	825.5 ± 96	485.1 ± 28.9	693.7 ± 80.2
Liver (pmol/g)	C18:1-Ser	14.9 ± 1.9	17 ± 1.2	13.2 ± 1.4	13.7 ± 2.4
Liver (pmol/g)	C18:1-Pro	12.2 ± 1.6	10.9 ± 0.9	7.8 ± 0.4	8.8 ± 1.7
Liver (pmol/g)	C18:1-Val	34.2 ± 5.4	52.3 ± 4.8	27.3 ± 5.1	39.2 ± 7.3
Liver (pmol/g)	C18:1-Thr	158.4 ± 18.4	226 ± 33.8	128.5 ± 7.5	150 ± 28.2
Liver (pmol/g)	C18:1-Cys	14.5 ± 3.2	22.9 ± 2.7	15.3 ± 4.3	6.5 ± 2.5
Liver (pmol/g)	C18:1-Leu/Ile	73.2 ± 11.3	96.7 ± 11	243.6 ± 51.4	90.9 ± 46.7
Liver (pmol/g)	C18:1-Asn
Liver (pmol/g)	C18:1-Asp
Liver (pmol/g)	C18:1-Gln/Lys	36.6 ± 5.5	35 ± 8.1	35.8 ± 2.3	44.7 ± 5.8
Liver (pmol/g)	C18:1-Glu
Liver (pmol/g)	C18:1-Met	21.8 ± 3.8	20.7 ± 3.3	11.3 ± 2.3	26.2 ± 3.4
Liver (pmol/g)	C18:1-His
Liver (pmol/g)	C18:1-Phe	41.8 ± 8.2	77.8 ± 18.6	56.2 ± 33.2	25.3 ± 4.8
Liver (pmol/g)	C18:1-Arg
Liver (pmol/g)	C18:1-Tyr	22 ± 3.2	26.4 ± 4.2	11.3 ± 2.8	10.3 ± 3.8
Liver (pmol/g)	C20:4-Gly	128 ± 11.9	41.5 ± 5	35.5 ± 7.6	39.7 ± 13.1
Liver (pmol/g)	C20:4-Ala	148.2 ± 15.5	127.8 ± 12.9	85.2 ± 13.5	71.4 ± 7.3
Liver (pmol/g)	C20:4-Ser	9 ± 1.3	7.7 ± 1.4	8 ± 0.6	6.9 ± 1.3
Liver (pmol/g)	C20:4-Pro	34.9 ± 4.6	36.9 ± 8.3	43.3 ± 8	51.3 ± 11.6
Liver (pmol/g)	C20:4-Val	17.3 ± 1.6	18.9 ± 2.9	15.2 ± 2.9	15.3 ± 4.4
Liver (pmol/g)	C20:4-Thr	38.6 ± 5.4	34.1 ± 7.7	27.5 ± 1	22 ± 1
Liver (pmol/g)	C20:4-Cys
Liver (pmol/g)	C20:4-Leu/Ile	26.4 ± 2.5	47 ± 5.9	26.3 ± 1.4	21 ± 3.2
Liver (pmol/g)	C20:4-Asn
Liver (pmol/g)	C20:4-Asp
Liver (pmol/g)	C20:4-Gln/Lys	15.2 ± 1.9	49.1 ± 9.8	13.3 ± 1.8	12.9 ± 2.8
Liver (pmol/g)	C20:4-Glu	7.9 ± 1.5	19.6 ± 4	16.3 ± 1.4	13.1 ± 6.3
Liver (pmol/g)	C20:4-Met	13.1 ± 2.5	22.3 ± 5.6	11.5 ± 1.4	9.6 ± 2.1
Liver (pmol/g)	C20:4-His
Liver (pmol/g)	C20:4-Phe	15.8 ± 2.8	21.9 ± 5.2	15.3 ± 1.3	16 ± 3.3
Liver (pmol/g)	C20:4-Arg	30.8 ± 3.8	37.4 ± 7.9	26.2 ± 2.5	20.7 ± 3.1
Liver (pmol/g)	C20:4-Tyr	12.6 ± 1.9	11.6 ± 1.7	7.9 ± 1.2	6.2 ± 0.7
Plasma (nM)	C18:1-Gly	123.1 ± 28.9	111.4 ± 35.3	129.6 ± 75.8	79.7 ± 15.2
Plasma (nM)	C18:1-Ala	112 ± 28.9	122.5 ± 36.9	111.9 ± 51.9	86.5 ± 18.6
Plasma (nM)	C18:1-Ser	10.3 ± 1.8	7.3 ± 1.2	8 ± 2.4	6.5 ± 3.8
Plasma (nM)	C18:1-Pro
Plasma (nM)	C18:1-Val	35.6 ± 9.2	62.3 ± 31.8	45.7 ± 22.9	36.6 ± 8.9
Plasma (nM)	C18:1-Thr	30 ± 8.1	31.2 ± 8.2	35 ± 7.3	14 ± 6.6
Plasma (nM)	C18:1-Cys
Plasma (nM)	C18:1-Leu/Ile	38.2 ± 8.4	48.7 ± 16	50.4 ± 17.6	27.3 ± 6.9
Plasma (nM)	C18:1-Asn
Plasma (nM)	C18:1-Asp
Plasma (nM)	C18:1-Gln/Lys	41.6 ± 9	54.9 ± 11.6	38.9 ± 20.9	34.8 ± 8
Plasma (nM)	C18:1-Glu
Plasma (nM)	C18:1-Met	27.6 ± 5.3	26 ± 11.1	20.9 ± 10.3	26 ± 7.4
Plasma (nM)	C18:1-His
Plasma (nM)	C18:1-Phe	29.9 ± 5.9	39.4 ± 7.7	39.8 ± 15.9	31.9 ± 2
Plasma (nM)	C18:1-Arg
Plasma (nM)	C18:1-Tyr
Plasma (nM)	C20:4-Gly	19.5 ± 5.1	18.8 ± 2.1	15.9 ± 4	23.5 ± 13.6
Plasma (nM)	C20:4-Ala	14.1 ± 4.5	9.8 ± 2.6	12.6 ± 3.7	7.8 ± 3.1
Plasma (nM)	C20:4-Ser
Plasma (nM)	C20:4-Pro
Plasma (nM)	C20:4-Val	2.8 ± 0.7	3.2 ± 0.4	2.7 ± 0.7	1.9 ± 0.6
Plasma (nM)	C20:4-Thr
Plasma (nM)	C20:4-Cys
Plasma (nM)	C20:4-Leu/Ile	16.2 ± 4.4	19.7 ± 5	14.3 ± 5	15.5 ± 9.5
Plasma (nM)	C20:4-Asn
Plasma (nM)	C20:4-Asp
Plasma (nM)	C20:4-Gln/Lys
Plasma (nM)	C20:4-Glu
Plasma (nM)	C20:4-Met
Plasma (nM)	C20:4-His
Plasma (nM)	C20:4-Phe
Plasma (nM)	C20:4-Arg	34.6 ± 6.9	32.5 ± 4.8	24.7 ± 2.2	26.5 ± 13.9
Plasma (nM)	C20:4-Tyr
