# Supplementary material for: Cooperative enzymatic control of N-acyl amino acids by PM20D1 and FAAH
Source: eLife. 2020 Apr 9;9:e55211. doi: 10.7554/eLife.55211 (PMC7145423; doi:10.7554/eLife.55211)
Supplement: Figure 4—source data 2. [file elife-55211-fig4-data2.xlsx]

## Sheet: Sheet1
Fig. 4. - Source Data 2. Absolute quantitation of N-acyl ethanolamines and N-acyl taurines n wild-type mouse liver.
Fatty acid chain	Head group	Abundance±SEM (pmol/g)
C16:1	Ethanolamine	27 ± 12
C16:0	Ethanolamine	179 ± 14
C18:2	Ethanolamine	27 ± 7
C18:1	Ethanolamine	791 ± 194
C18:0	Ethanolamine	189 ± 8
C20:4	Ethanolamine	23 ± 9
C16:1	Taurine	215 ± 54
C16:0	Taurine	510 ± 130
C18:2	Taurine	680 ± 160
C18:1	Taurine	240 ± 120
C18:0	Taurine	170 ± 30
C20:4	Taurine	640 ± 150
