# Supplementary material for: Cooperative enzymatic control of N-acyl amino acids by PM20D1 and FAAH
Source: eLife. 2020 Apr 9;9:e55211. doi: 10.7554/eLife.55211 (PMC7145423; doi:10.7554/eLife.55211)
Supplement: Figure 5—source data 1. [file elife-55211-fig5-data1.xlsx]

## Sheet: Table S2
Fig. 5. - Source Data 1. Absolute quantitation of N-acyl amino acids in liver and plasma following PM20D1 or dual PM20D1/FAAH blockade.
Tissue and units	N-acyl amino acid	WT + Veh	PM20D1-KO + Veh	PM20D1-KO + PF-3845 (3d)
Liver (pmol/g)	C18:1-Gly	270 ± 27.3	143.8 ± 13.4	2400 ± 561.6
Liver (pmol/g)	C18:1-Ala	658.8 ± 13.4	240 ± 49.4	258.8 ± 44.8
Liver (pmol/g)	C18:1-Ser	11.3 ± 3.8	5.3 ± 0.8	146.3 ± 16.8
Liver (pmol/g)	C18:1-Pro	8.8 ± 1.7	28.8 ± 9	26.3 ± 6.9
Liver (pmol/g)	C18:1-Val	38 ± 4.9	78.8 ± 24.1	70 ± 15.1
Liver (pmol/g)	C18:1-Thr	8.3 ± 3.9	18.8 ± 3.1	27.5 ± 5.2
Liver (pmol/g)	C18:1-Cys
Liver (pmol/g)	C18:1-Leu/Ile	50 ± 12.4	496.3 ± 93.7	612.5 ± 47.3
Liver (pmol/g)	C18:1-Asn	8.9 ± 3.6	45 ± 7.4	41.3 ± 7.7
Liver (pmol/g)	C18:1-Asp
Liver (pmol/g)	C18:1-Gln/Lys	66.3 ± 13.9	625 ± 47.9	937.5 ± 82.6
Liver (pmol/g)	C18:1-Glu	13.1 ± 5.5	48.8 ± 14.6	65 ± 8.2
Liver (pmol/g)	C18:1-Met	12.8 ± 1.3	86.6 ± 7.9	97.5 ± 8.8
Liver (pmol/g)	C18:1-His	22 ± 10	68.8 ± 13.3	70 ± 10.6
Liver (pmol/g)	C18:1-Phe	25.5 ± 8	350 ± 136.9	487.5 ± 178.4
Liver (pmol/g)	C18:1-Arg
Liver (pmol/g)	C18:1-Tyr	25 ± 6.5	12.5 ± 4.8	10 ± 3.5
Liver (pmol/g)	C20:4-Gly	196.3 ± 17.4	126.3 ± 37	1030 ± 588.8
Liver (pmol/g)	C20:4-Ala	191.3 ± 16.8	70 ± 17.9	133.8 ± 12.5
Liver (pmol/g)	C20:4-Ser	4.3 ± 2.2	5.6 ± 4.8	112.5 ± 9.2
Liver (pmol/g)	C20:4-Pro	22.4 ± 11.4	19.8 ± 6.9	17.8 ± 8.6
Liver (pmol/g)	C20:4-Val	30 ± 9.1	36.3 ± 6.3	56.3 ± 7.2
Liver (pmol/g)	C20:4-Thr	27.5 ± 7.8	28.8 ± 9	26.1 ± 2.4
Liver (pmol/g)	C20:4-Cys
Liver (pmol/g)	C20:4-Leu/Ile	56.3 ± 14	375 ± 43.3	550 ± 35.4
Liver (pmol/g)	C20:4-Asn	8.9 ± 6.5	26.3 ± 5.2	38.8 ± 11.3
Liver (pmol/g)	C20:4-Asp
Liver (pmol/g)	C20:4-Gln/Lys	41.3 ± 6.6	80 ± 9.4	92.5 ± 9.2
Liver (pmol/g)	C20:4-Glu	7.4 ± 3.8	18.3 ± 2.7	11.9 ± 1.1
Liver (pmol/g)	C20:4-Met	12.9 ± 4.1	32.5 ± 6	23.5 ± 10.4
Liver (pmol/g)	C20:4-His
Liver (pmol/g)	C20:4-Phe	18.8 ± 2.4	295 ± 42.5	346.3 ± 15.7
Liver (pmol/g)	C20:4-Arg	11.6 ± 3.8	21 ± 2.7	13.3 ± 5.7
Liver (pmol/g)	C20:4-Tyr	16.1 ± 4.8	20 ± 4.2	9.3 ± 4.7
Plasma (nM)	C18:1-Gly	155.5 ± 14.9	153.3 ± 11.4	382.8 ± 35.1
Plasma (nM)	C18:1-Ala	153.8 ± 12.3	135 ± 22.7	165.6 ± 26.2
Plasma (nM)	C18:1-Ser	12.4 ± 2.2	15.2 ± 0.6	27.6 ± 8.7
Plasma (nM)	C18:1-Pro
Plasma (nM)	C18:1-Val	40.1 ± 14.2	35.7 ± 12.8	40.1 ± 3.5
Plasma (nM)	C18:1-Thr	40.6 ± 6	36.3 ± 7.9	52.5 ± 5.9
Plasma (nM)	C18:1-Cys
Plasma (nM)	C18:1-Leu/Ile	46.9 ± 6.2	46.2 ± 2.6	77.5 ± 10.1
Plasma (nM)	C18:1-Asn
Plasma (nM)	C18:1-Asp
Plasma (nM)	C18:1-Gln/Lys	43.4 ± 8.7	91.7 ± 7.9	86.9 ± 6.8
Plasma (nM)	C18:1-Glu
Plasma (nM)	C18:1-Met	33.9 ± 4	27.5 ± 4.6	16.9 ± 4.2
Plasma (nM)	C18:1-His
Plasma (nM)	C18:1-Phe	36.8 ± 3.4	32 ± 3.6	59.5 ± 10
Plasma (nM)	C18:1-Arg
Plasma (nM)	C18:1-Tyr
Plasma (nM)	C20:4-Gly	23.5 ± 5	27.5 ± 0.7	170.9 ± 6.6
Plasma (nM)	C20:4-Ala	17.3 ± 1.6	18.5 ± 0.4	27.5 ± 6.4
Plasma (nM)	C20:4-Ser
Plasma (nM)	C20:4-Pro
Plasma (nM)	C20:4-Val	3.3 ± 1.7	4.2 ± 0.5	6.3 ± 2.6
Plasma (nM)	C20:4-Thr
Plasma (nM)	C20:4-Cys
Plasma (nM)	C20:4-Leu/Ile	14.5 ± 3	39.7 ± 3.1	45.4 ± 10.9
Plasma (nM)	C20:4-Asn
Plasma (nM)	C20:4-Asp
Plasma (nM)	C20:4-Gln/Lys
Plasma (nM)	C20:4-Glu
Plasma (nM)	C20:4-Met
Plasma (nM)	C20:4-His
Plasma (nM)	C20:4-Phe
Plasma (nM)	C20:4-Arg	46 ± 16	30.8 ± 6.3	43 ± 7.7
Plasma (nM)	C20:4-Tyr
